# Supplementary material for: Inhibiting neutral amino acid transport for the treatment of phenylketonuria
Source: JCI journal article supplement (doi:10.1172/jci.insight.121762), 2018-07-25
Supplement: sd1 [file 1]

## Supplementary Figures

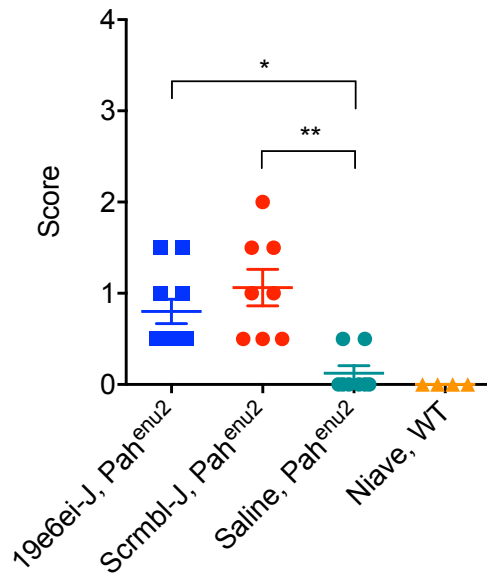

| Score | Criteria                                                                                             |
|-------|------------------------------------------------------------------------------------------------------|
| 0     | No lesions observed                                                                                  |
| 1     | Mild: scattered small foci of tubular epithelial necrosis/regeneration affecting <25% of the tubules |
| 2     | Moderate: tubular epithelial necrosis/regeneration affecting 25-50% of the tubules                   |
| 3     | Marked: tubular epithelial necrosis/regeneration affecting 51-75% of the tubules                     |
| 4     | Severe: tubular epithelial necrosis/regeneration affecting 76-100% of the tubules                    |

**Supplementary Figure 1.** Histopathology score after intravenous administration of peptide-conjugated morpholino oligonucleotides. Animals were injected intravenously (7.5 mg/kg) with *Slc6a19* PPMO (19e6ei-J), control PPMO (Scrambl-J), or saline on days 0, 1, 8, 15, and 22. Kidneys were harvested on day 25, fixed in formalin, embedded in paraffin, sectioned at 5 microns and stained with hematoxylin and eosin. Slides were evaluated semi-quantitatively for the presence of renal tubular necrosis and regeneration using the scoring system shown above. \* $P < 0.05$ , \*\* $P = 0.0011$  versus wild-type.

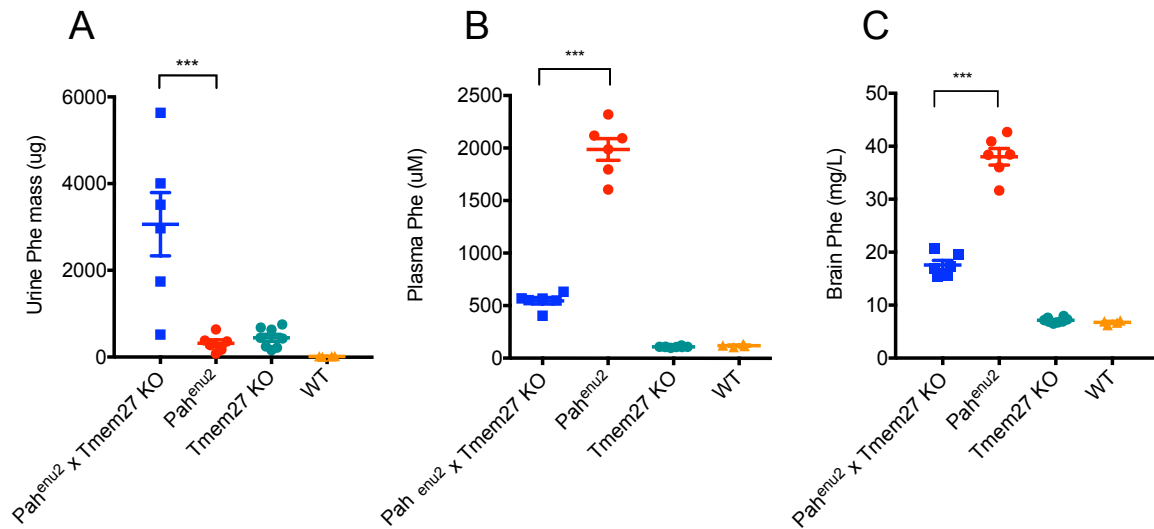

**Supplementary Figure 2.** Decreased Phe levels in *Pah<sup>enu2</sup>* mice lacking *Tmem27*. **(A)** Excretion of Phe in the urine of *Pah<sup>enu2</sup> x Tmem27 KO* mice. Mice were placed in metabolic cages and urine was collected for 24h. **(B)** Phe levels in plasma. **(C)** Phe levels in brain. Animals were perfused with phosphate-buffered saline and whole brains were harvested. Phe was quantitated by HPLC/tandem MS/MS. Phe is expressed as mg Phe per liter of brain homogenate. N=4-8 animals/group. One-way ANOVA was performed, follow by Tukey's multiple comparisons test. \*\*\*P < 0.0001. Shown are means +/- SEM.
